# Supplementary material for: Skin immunisation activates an innate lymphoid cell-monocyte axis regulating CD8+ effector recruitment to mucosal tissues
Source: PubMed Central journal article supplement (PMC6525176; doi:10.1038/s41467-019-09969-2), 2019-05-17
Supplement: 41467_2019_9969_MOESM1_ESM.pdf [file 41467_2019_9969_MOESM1_ESM.pdf]

## **Supplementary Information**

**Skin immunisation activates an innate lymphoid cell-monocyte axis regulating  
CD8<sup>+</sup> effector recruitment to mucosal tissues.**

Zaric et al.

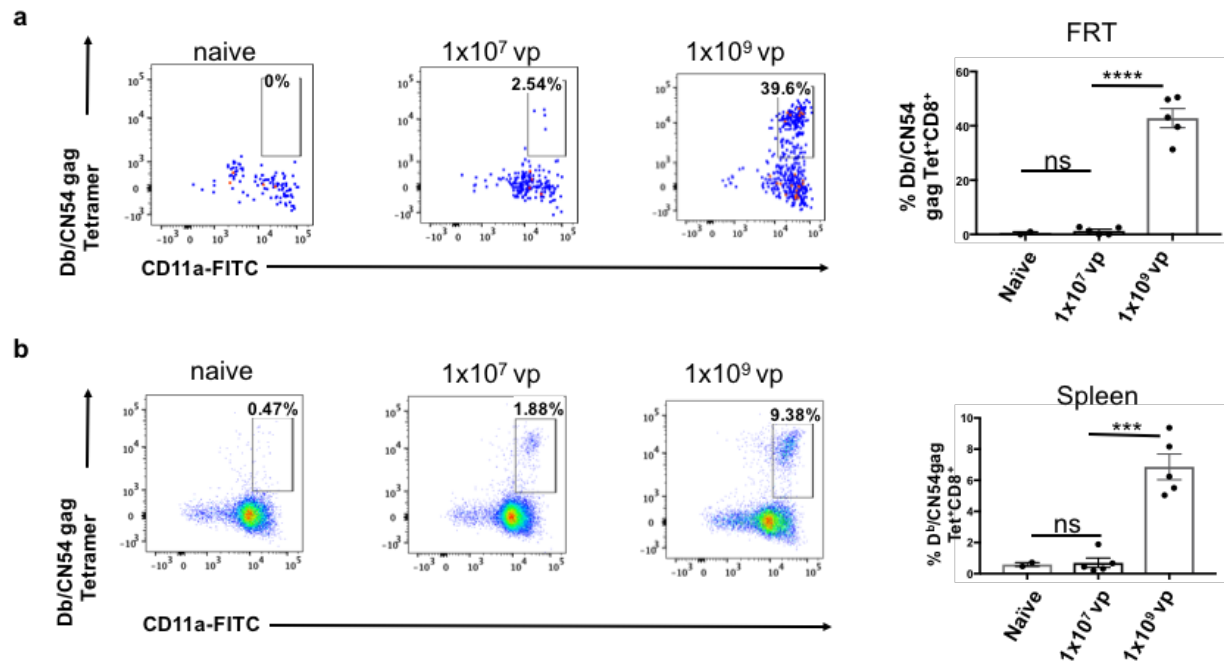

**Supplementary Figure 1.**

**Tetramer<sup>+</sup>CD8<sup>+</sup> T cell responses in the FRT and spleen after skin immunisation with a dose titration of Ad CN54gag.** Mice were immunised ID with 1 X 10<sup>9</sup> or 1 X 10<sup>7</sup> vp of Ad-CN54gag. Representative flow cytometry dot-plots and summary graphs showing frequency of D<sup>b</sup>/CN54 gag Tet<sup>+</sup> CD8<sup>+</sup> T cells from the FRT (**a**) and spleen (**b**) on day 14-post immunisation and naïve controls. Data represent mean ± SEM of n=5 /experimental groups and n=2 naïve. \*\*\*p<0.001 by one-way ANOVA.

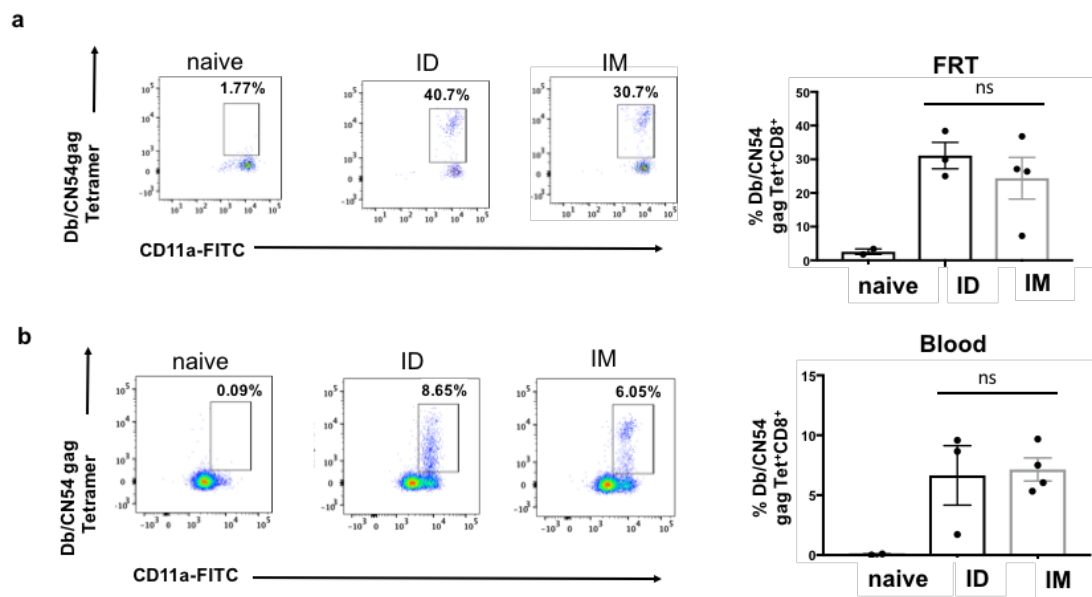

### Supplementary Figure 2.

**Immunisation by the ID and IM route recruit CD8<sup>+</sup> T cells to the FRT.**

Representative flow cytometry plots and summary graphs showing frequencies of CD8<sup>+</sup> D<sup>b</sup>/CN54 gag Tet<sup>+</sup> cells from (a) FRT tissue and (b) blood on day 14 after ID or IM immunisation with Ad-CN54gag and from naïve mice. Data represent mean ± SEM of n=3-4 /experimental groups and n=2 naive. Data were analysed by one-way ANOVA, ns not significant.

**a**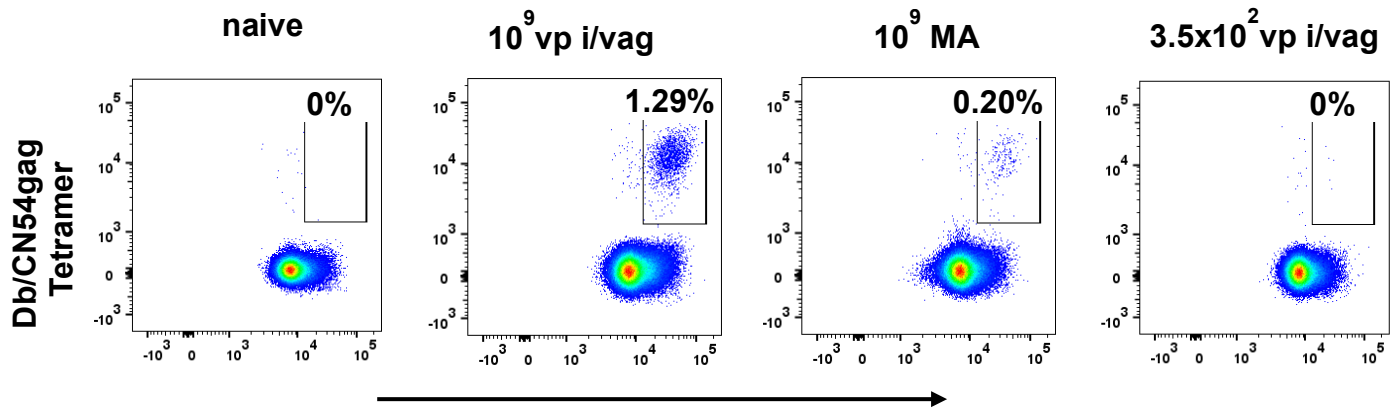**b**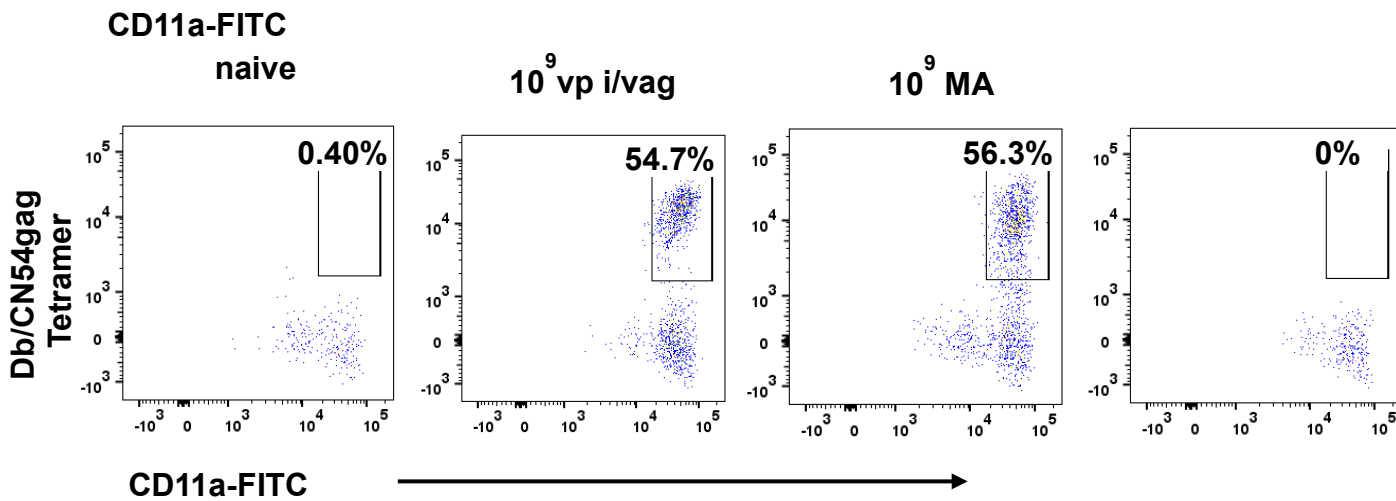**Supplementary Figure 3.**

**Ad vaccine bio-distributed to FRT does not prime CD8<sup>+</sup> T cells in FRT or iliac LNs.** Mice were immunised by MA into skin or by injection into the vaginal mucosa (i/vag) with 1x10<sup>9</sup> vp Ad-CN54gag. Some mice received 3.5x10<sup>2</sup> vp of the same vaccine by intra-vaginal injection. Representative flow cytometry dot-plots showing frequency of Db/CN54 gag tet<sup>+</sup> CD8<sup>+</sup> T cells in the iliac LNs (**a**) and FRT tissue (**b**) on day 14-post immunisation. Data are representative of three independent experiments, n=7-9 / group.

**a**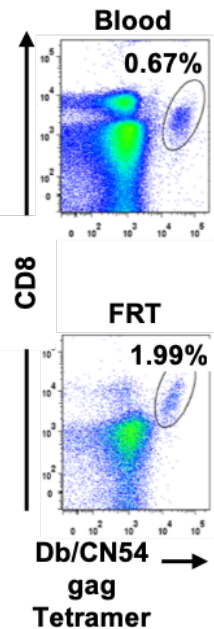**b**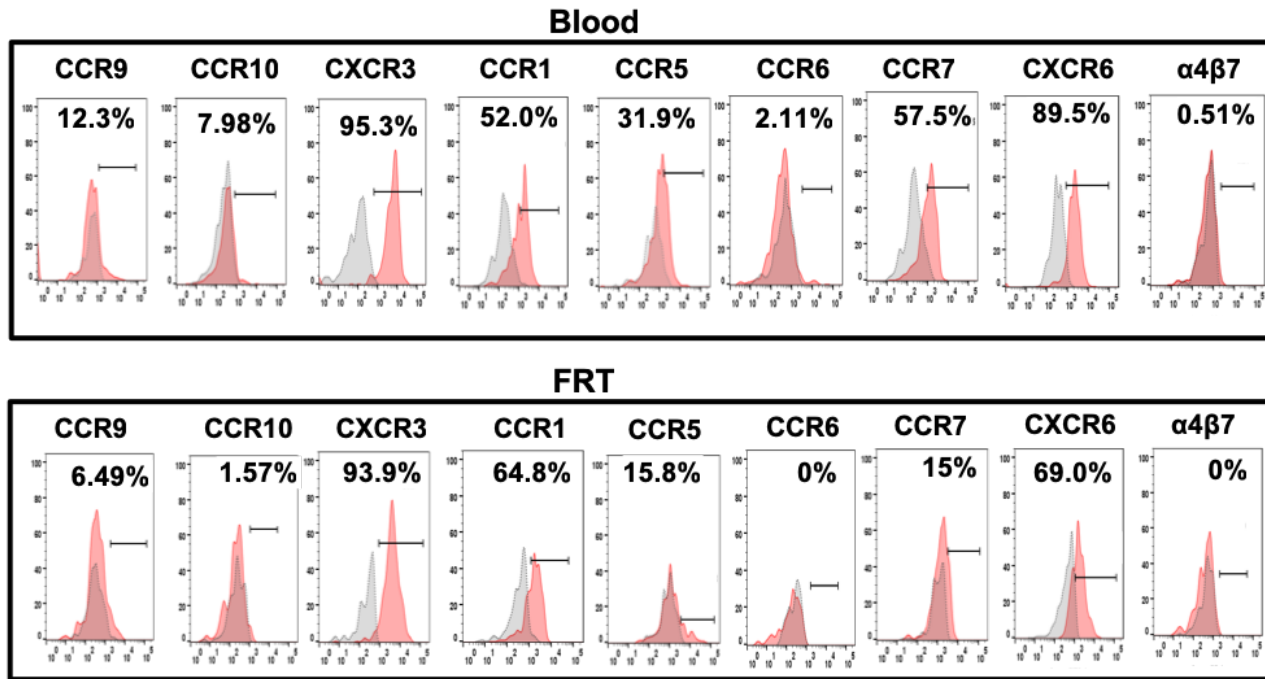**Supplementary Figure 4.**

**Chemokine receptor and integrin expression on antigen-specific CD8<sup>+</sup> T cells present in the FRT after skin immunisation.** (a) Representative flow cytometric dot plots of D<sup>b</sup>/CN54 gag<sup>+</sup> CD8<sup>+</sup> T cells from the peripheral blood (upper panel) and FRT (lower panel) on day 7 after immunisation with Ad-CN54 gag (1x10<sup>9</sup> vp) by MA to the skin. (b) Representative histograms showing expression of CCR9, CCR10, CCR1, CCR5, CCR6, CCR7, CXCR3, CXCR6 and  $\alpha 4\beta 7$  (gated on D<sup>b</sup>/CN54 gag tet<sup>+</sup> CD8<sup>+</sup> cells) from peripheral blood (upper panel) or FRT tissue (lower panel) on day 7 after skin MA immunisation with Ad-CN54 gag. MA (red histograms); grey-filled histograms represent unstained control. Numbers within histograms indicate percent chemokine / integrin receptor expressing cells. Data are representative of two independent experiments.

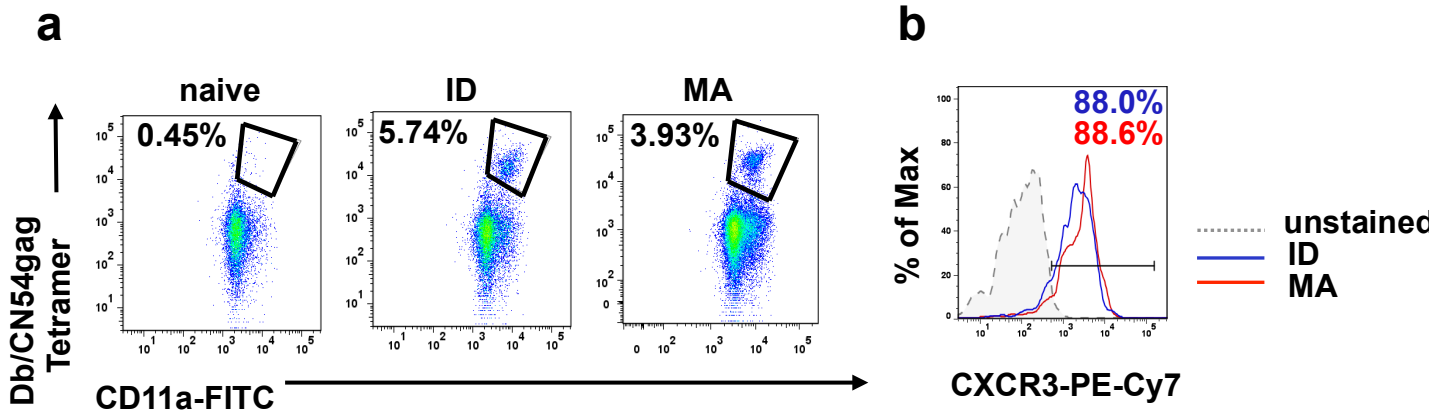

### Supplementary Figure 5.

#### Antigen-specific CD8<sup>+</sup> T cells recruited to the lung after skin immunisation express CXCR3.

Mice were immunized with Ad-CN54 gag either by ID injection or MA skin application or left naive. Lungs were harvested 14 days post immunisation. (a) Representative flow cytometry histograms showing frequency of D<sup>b</sup>/CN54gag tetramer<sup>+</sup> cells (gated on CD45<sup>+</sup>CD4<sup>-</sup>MHCII<sup>-</sup>CD8<sup>+</sup> cells) in the lung induced by either MA or ID immunisation. Data are representative of 3 independent experiments (n=6-9 per group). (b) Representative histograms indicating CXCR3<sup>+</sup> profile of gated D<sup>b</sup>/CN54gag tetramer<sup>+</sup> CD8<sup>+</sup> T cells in lung tissue of MA (red histogram) or ID (blue histogram) immunised mice. Grey-filled histograms represent unstained control immunised mouse.

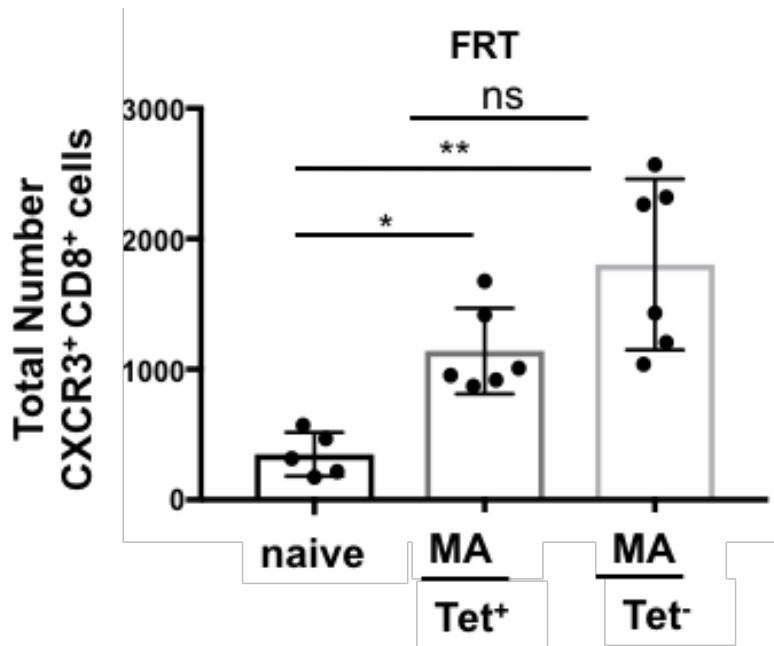

**Supplementary Figure 6.**

**CXCR3 is expressed by CD8<sup>+</sup> T cells recruited to the FRT.** Total numbers of CXCR3<sup>+</sup> CD8<sup>+</sup> cells in the FRT of naïve and Ad CN54gag immunised mice were analysed by flow cytometry at day 14-post immunisation. Bar graph summarises total number of CXCR3<sup>+</sup> cells from a gated CD45<sup>+</sup>CD8<sup>+</sup>D<sup>b</sup>/CN54gag tetramer negative (Tet<sup>-</sup>) or tetramer positive (Tet<sup>+</sup>) population from two independent experiments (n=6 for experimental groups). \* p<0.05, \*\*p<0.001 by one-way ANOVA.

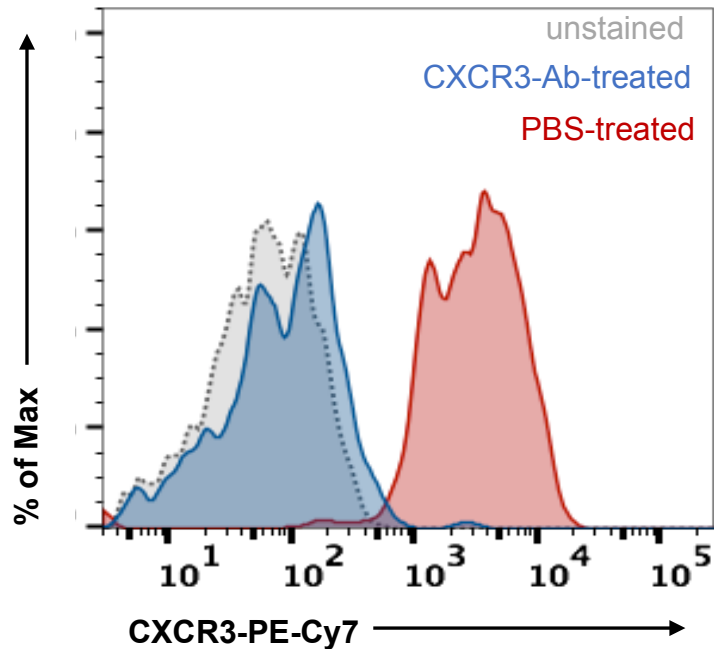

### Supplementary Figure 7.

**Anti-CXCR3 mAb blocks CXCR3 on effector OT-I cells.** Congenic CD45.1 OT-I cells ( $2 \times 10^5$ ) were transferred into WT mice. Five days after Ad-OVA skin immunisation some were treated with anti-CXCR3 Ab. On day 7, effector OT-I cells ( $2 \times 10^6$ ) isolated from these mice were transferred into secondary hosts (some treated with anti-CXCR3 Ab) infected with either Ad-OVA via MA or intra-vaginal injection 3.5 days earlier. Some secondary recipients were intra-vaginally injected with Ad-CN54 gag or PBS. 3.5 days prior to effector OT-I cells transfer. One and a half day after adoptive transfer of the effector OT-I cells into secondary recipients, CXCR3 expression on CD45.1<sup>+</sup> OT-I cells isolated from the spleens of different recipients was assessed by flow cytometry. Flow cytometry histograms, representative from two independent experiments (n=6 per experimental group) are shown.



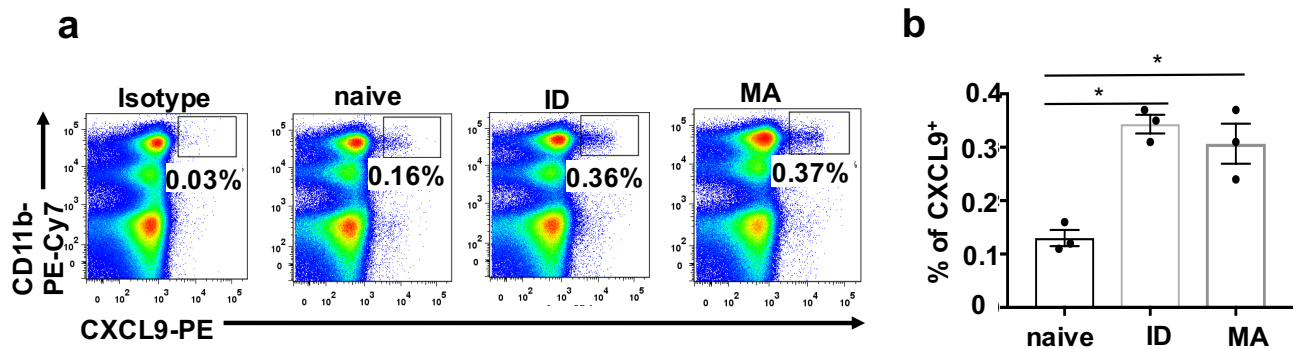

**Supplementary Figure 8.**

**CD11b<sup>+</sup> cells in the respiratory tract express the CXCL9 ligand for CXCR3<sup>+</sup> cells after skin immunization.** (a) Representative flow cytometry histograms and (b) summary graph showing frequency of CD11b<sup>+</sup> cells expressing CXCL9 (gated on CD45<sup>+</sup>) from lungs of ID or MA immunised mice at day 3 and naïve controls. Data are representative of three independent experiments, n=3 per group. \*  $P < 0.05$ , by one-way ANOVA, error bars show s.e.m.

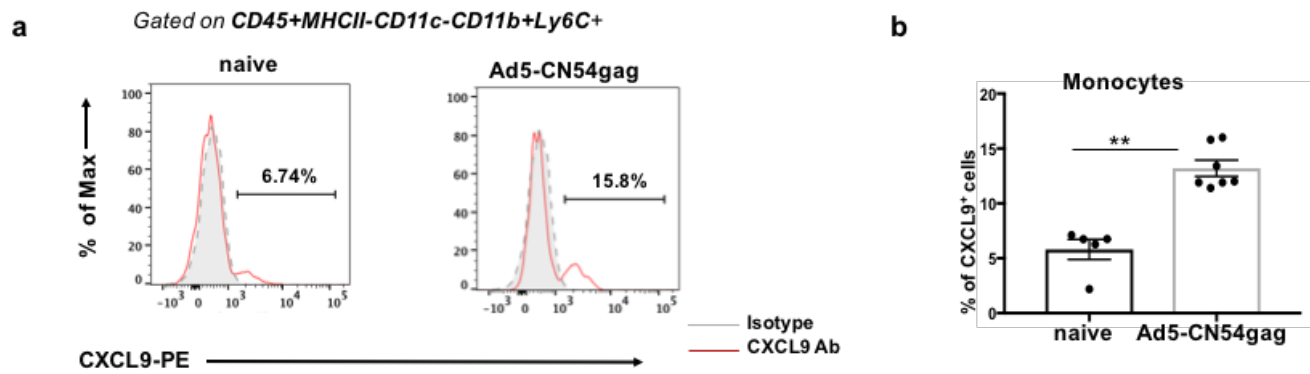

**Supplementary Figure 9.**

**Monocytes infiltrating the FRT express the CXCR3 ligand CXCL9 after skin immunisation.** (a) Representative flow cytometry histograms and (b) summary bar graph of CXCL9 expressed on  $CD45^+Ly6C^+CD11b^+MHCII^-CD11c^-$  cells isolated from FRT tissue at day 14 after skin immunisation with Ad-CN54 gag via ID injection or from naïve mice. Data represent mean  $\pm$  SEM of  $n=5-7$  /experimental group. \*\* $p<0.01$  by one-way ANOVA.

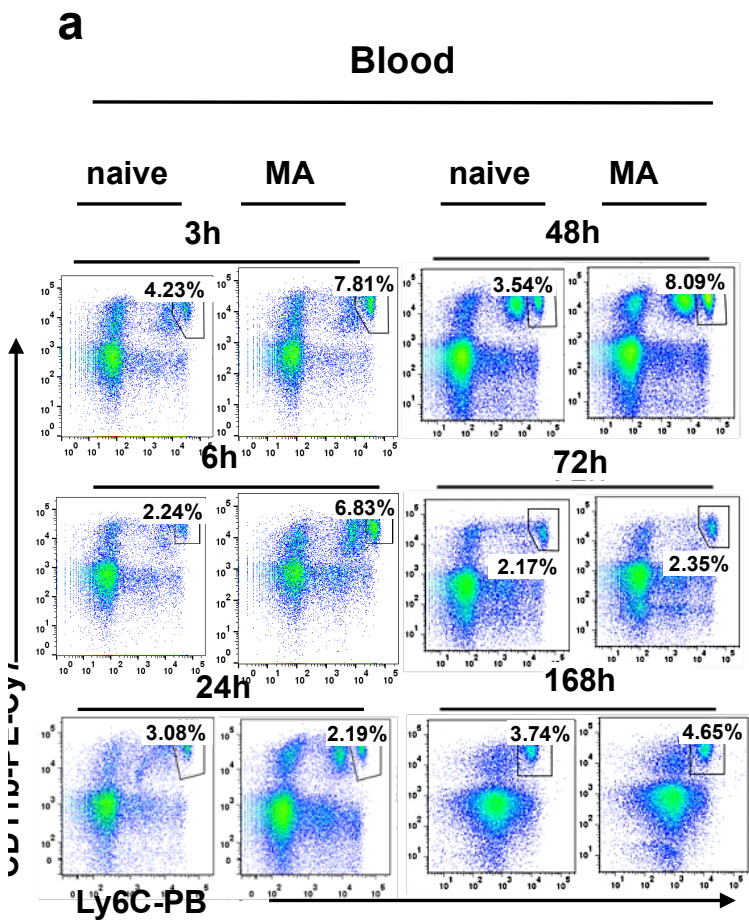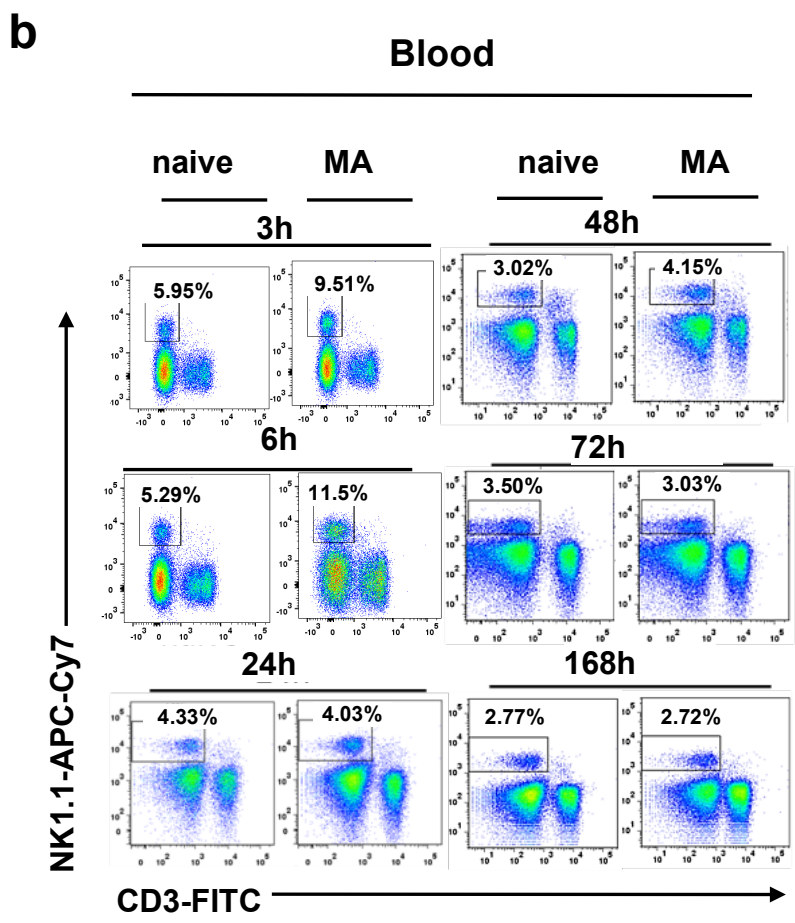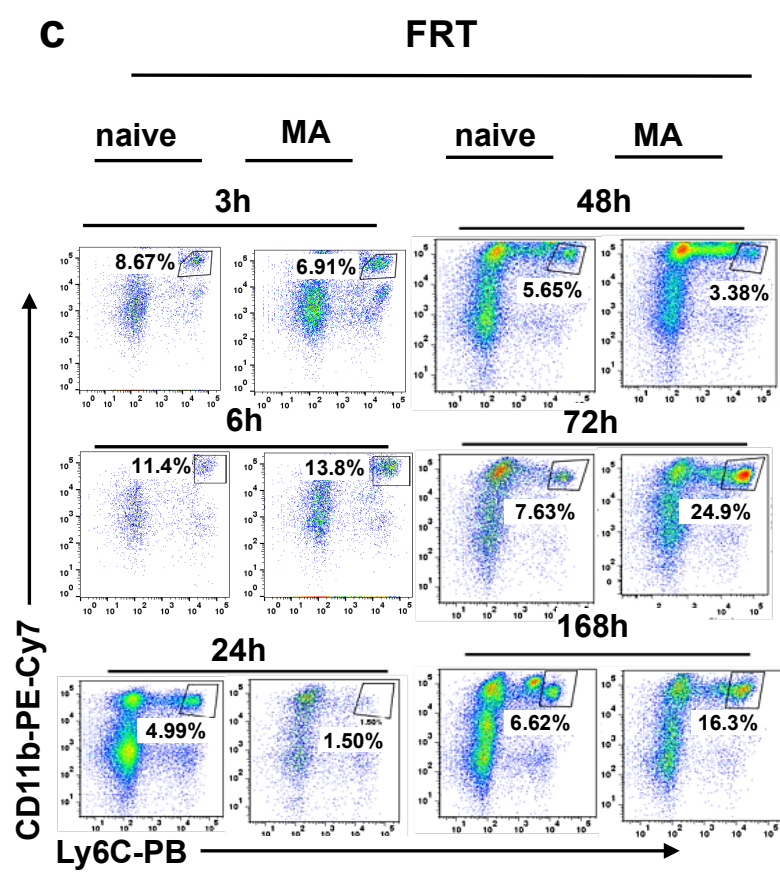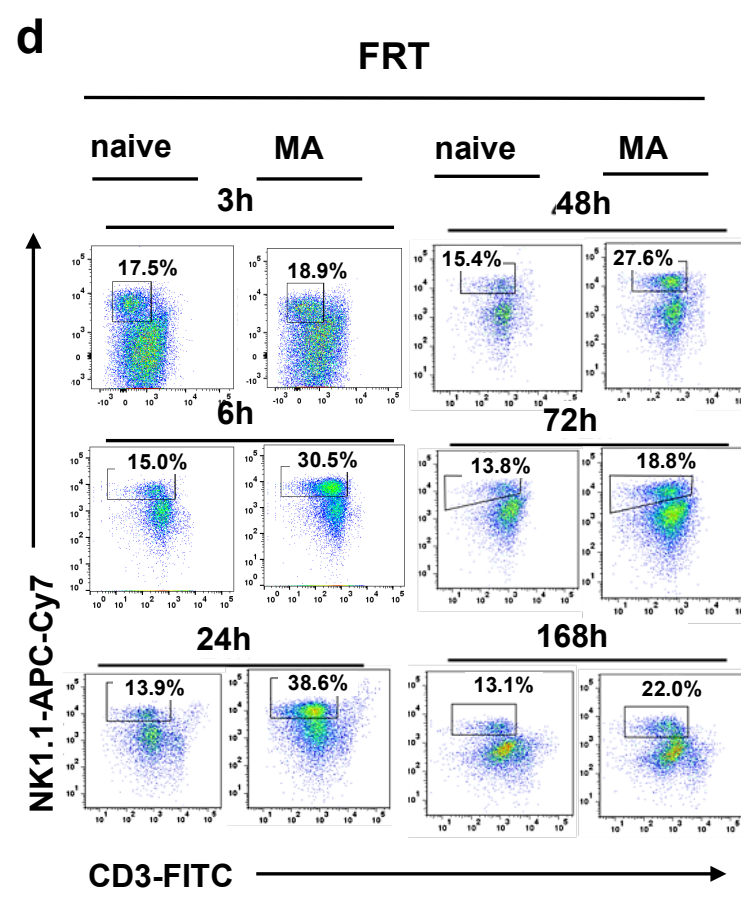

**Supplementary Figure 10.**

**Skin immunisation with Ad-CN54 gag promotes the early recruitment of group 1 ILCs and monocytes to the FRT.** Representative flow cytometry dot plots of monocytes (Ly6C<sup>+</sup>CD11b<sup>+</sup>) (**a,c**) and group 1 ILCs (NK1.1<sup>+</sup>CD3<sup>-</sup>) (**b,d**) in peripheral blood or FRT tissue at indicated time points after skin immunisation by MA with Ad-CN54 gag. Data are representative from three independent experiments, n=6-9 per group.

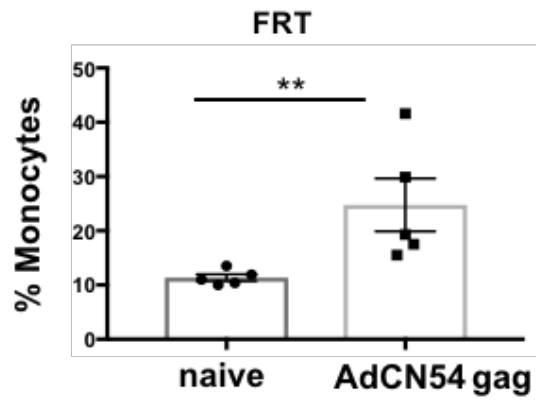

**Supplementary Figure 11.**

**Ly6C<sup>+</sup> monocytes remain elevated in the FRT at 14 days after skin immunisation.** Bar graph summaries frequency of monocytes (CD45<sup>+</sup>Ly6C<sup>+</sup>CD11b<sup>+</sup>MHCII<sup>-</sup>) analysed in FRT tissue from naïve or Ad-CN54gag skin immunised mice on day 14. Data represent mean ± SEM of n=5 /experimental group.

\*\*p<0.01 by one-way ANOVA.

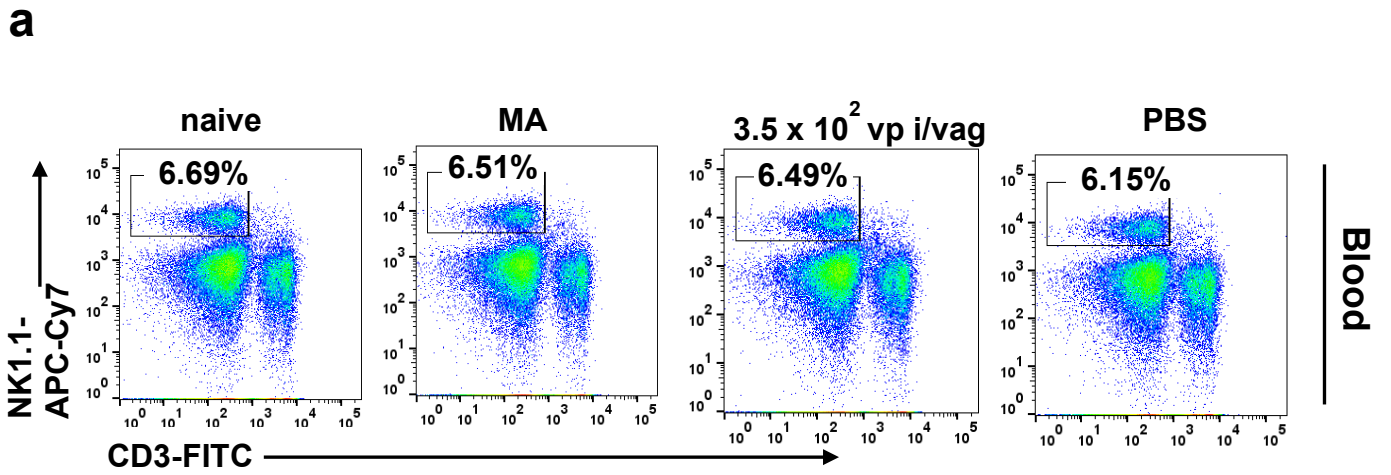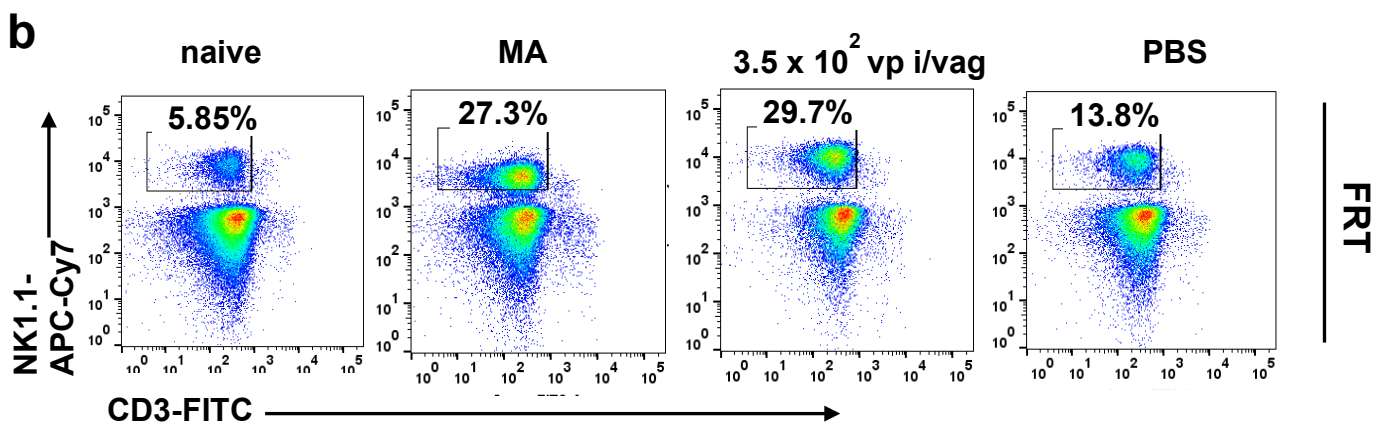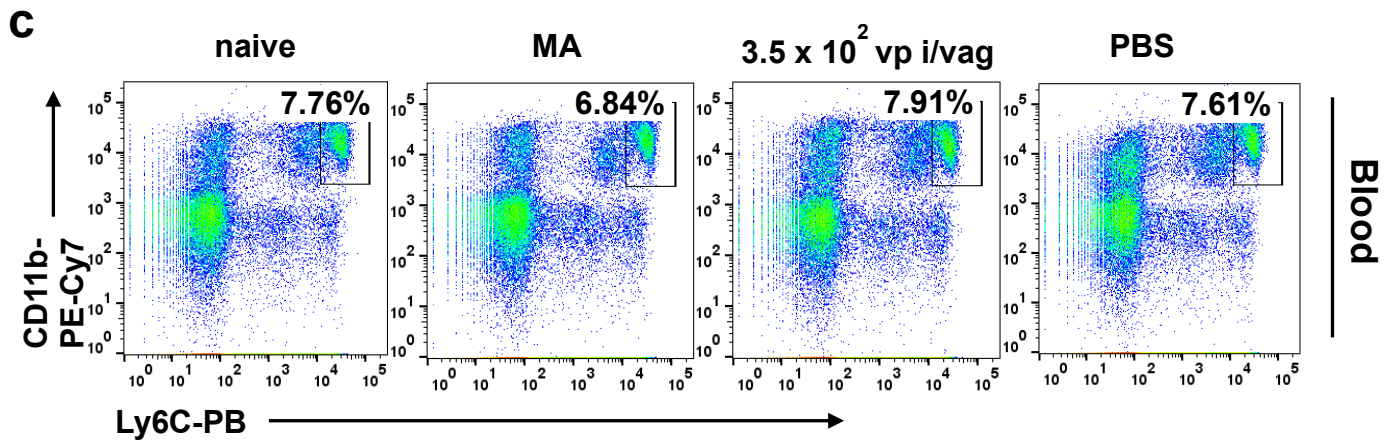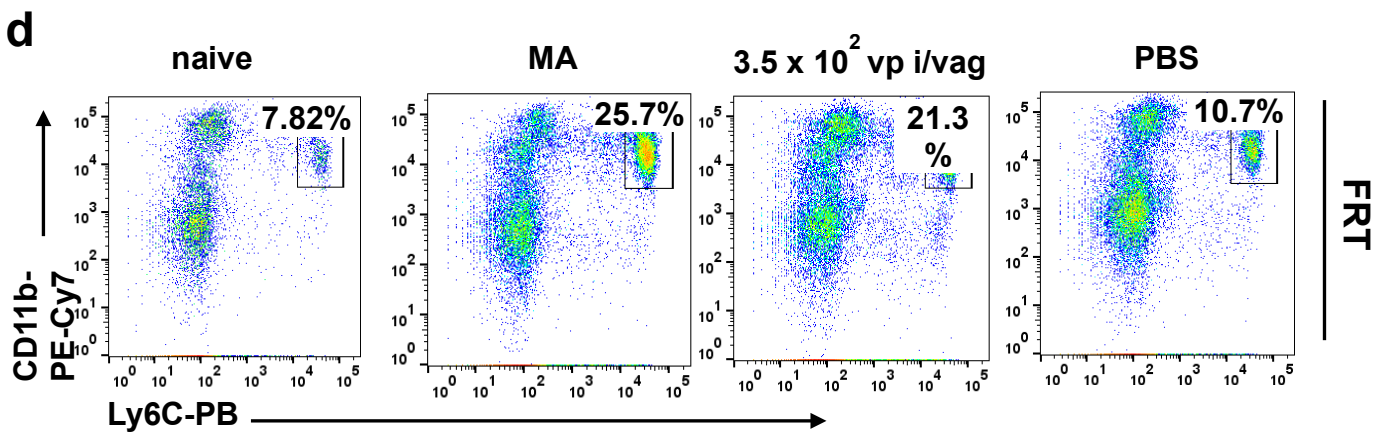

**Supplementary Figure 12.**

**Intra vaginal injection of equivalent Ad vector dose bio-distributed by MA immunisation induces infiltration of monocytes and group 1 ILCs to the FRT.**

Mice were immunised with Ad-CN54 gag by MA delivery to skin ( $1 \times 10^9$  vp) or by injection to the vaginal mucosa (i/vag) with  $3.5 \times 10^2$  vp (equivalent to the bio-distributed Ad vector dose). Control mice were injected PBS (i/vag.). After 1 day (group 1 ILCs) and after 3 days (monocytes) were enumerated from peripheral blood and FRT tissues. Representative flow cytometry dot plots show group 1 ILCs in peripheral blood (**a**), in FRT tissue (**b**), and monocytes in peripheral blood (**c**) and in FRT tissue (**d**). Data are representative of three independent experiments ( $n = 6-9$  per experimental group).

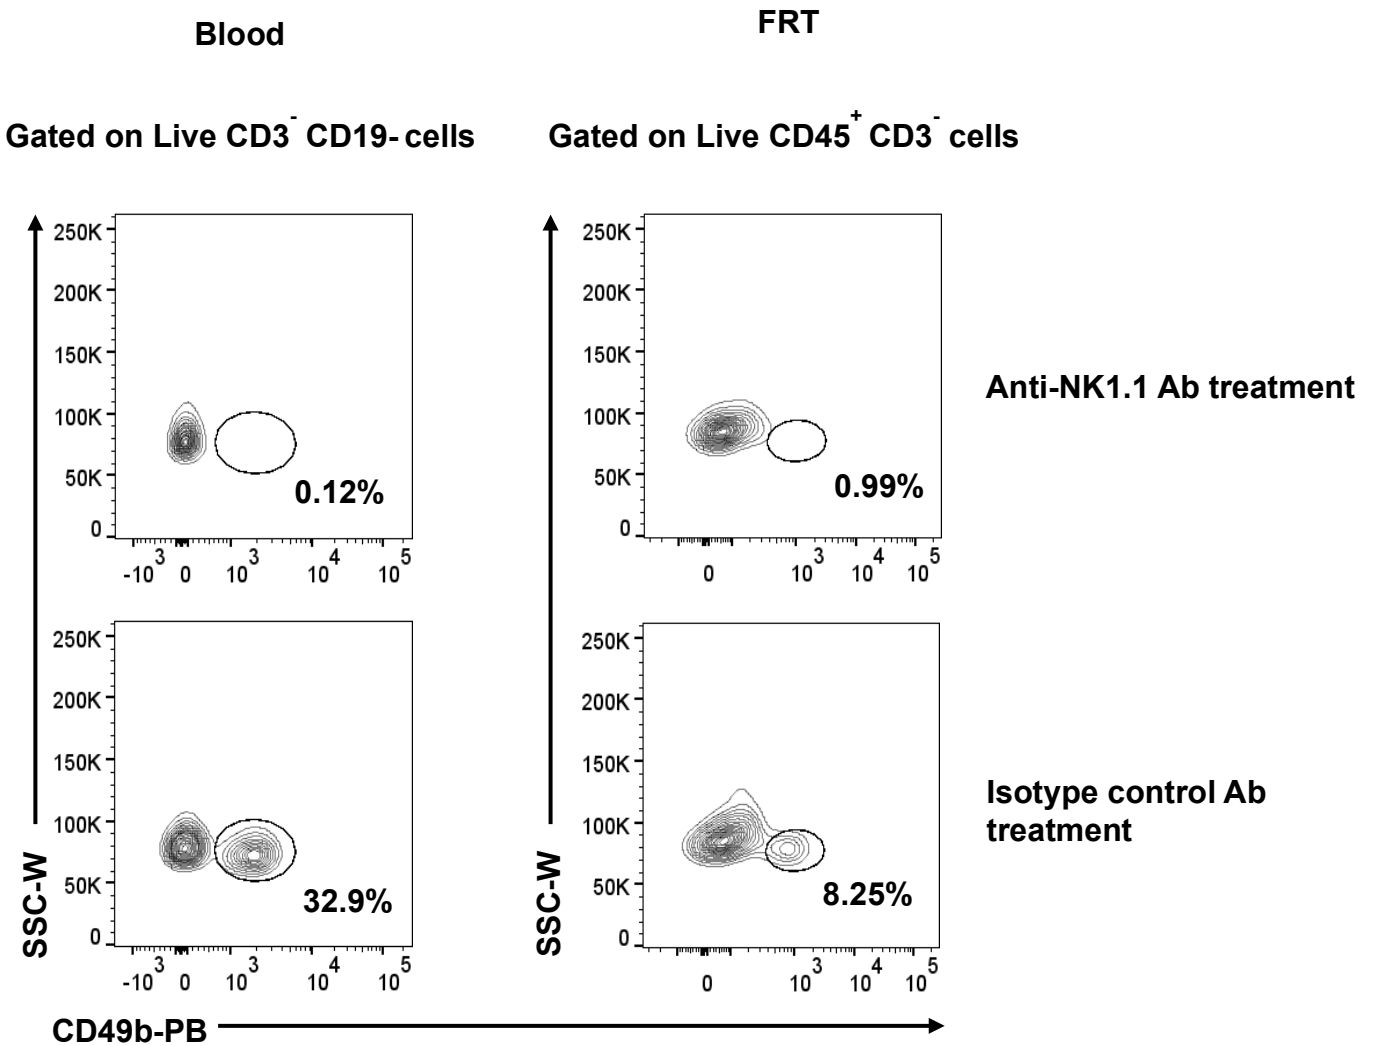

**Supplementary Figure 13.**

**Anti-NK1.1 mAb depletes group 1 ILCs.** (a) 200 $\mu$ l of anti-NK1.1 Ab (PK136) or isotype control Ab administered i.p. Frequency of CD19<sup>-</sup>CD3<sup>-</sup>CD49b<sup>+</sup> cells were analysed in blood and CD45<sup>+</sup>CD3<sup>-</sup>CD49<sup>+</sup> cells in FRT tissues at 24 h post-injection. Data are representative of six mice.



### Nucleotide sequence of HIV-1 CN54 gag

atgggcgccagggccagcatcctgagggcgcaagctggacaagtgggagaagatcaggctgaggcccggcg  
gcaagaagcactacatgctgaagcacctggtgtgggcccagcagggagctggagaggttcgccctgaaccccggcc  
tgctggagaccagcagggctgcaagcagatcatgaagcagctgcagagcgcctgcagaccggcaccgagga  
gctgaggagcctgttcaacaccgtggccaccccactgctgcacaccgagatcgacgtgaggacaccagggga  
ggccctggacaagatcgaggaggagcagaacaagatccagcagaagaccagcaggccaaggaggccgacg  
gcaaggtgagccagaactacccatcgtgcagaacctgcagggccagatggtgcaccagcccacagcccagg  
accctgaatgcatgggtgaaggtggtggaggagaaggcctcagccccgaggtgatccccatggtcagcgcctga  
gagggcgccaccccctcaggacctgaacacctgctgaacaccgtgggcccaccaggccgcatgcagatc  
ctgaaggacacctcaacgaggaggccgcccagtggtggacaggtgcaccccgtgcacgcccggccccatgccc  
ccggccagatgaggagcccaggggagcgcacatcgccggcaccaccagcaacctgcaggagcagatcgct  
ggatgaccagcaacccaccgtgcccgtggcgacatctacaagaggtggatcatcctgggattgaacaagatcgt  
gaggatgtacagccccaccagcatcctggacatcaagcagggcccaaggagccctcagggactacgtggaca  
ggtcttcaagacctgagggccgagcaggccaccagggcgtgaagaactggatgaccgacacctgctggtgc  
agaacgccaaccccgactgcaagacctcctgagggccctgggccccggcgcagcatcaggagatgatgacc  
gctgccagggcgtgggcccagccacaaggccaaggtgctggccgaggccatgagccagaccaacagc  
gccatcctgatgcagaggagcaactcaagggcagcaagaggatcgtgaagtctcaactgcggcaaggagggc  
cacatgccaggaactgcagggccccaggaagaagggtgctggaagtgcggaaggagggccaccagatg  
aaggactgcaccgagaggcaggccaactcctgggcaagatctggcccagccacaaggcgcccccggcaact  
cctgcagaacaggcccagcccaccgcccccccgaggagagctcaggtcaggaggagaccaccaccccc  
agccagaagcaggagcccacgacaaggagctgtaccctgaccagcctgaagagcctgttcggcaacgacc  
cagcagccag

### Supplementary Figure 14.

Nucleotide sequence of the optimised HIV-1 CN54 gag gene used for cloning into VV.

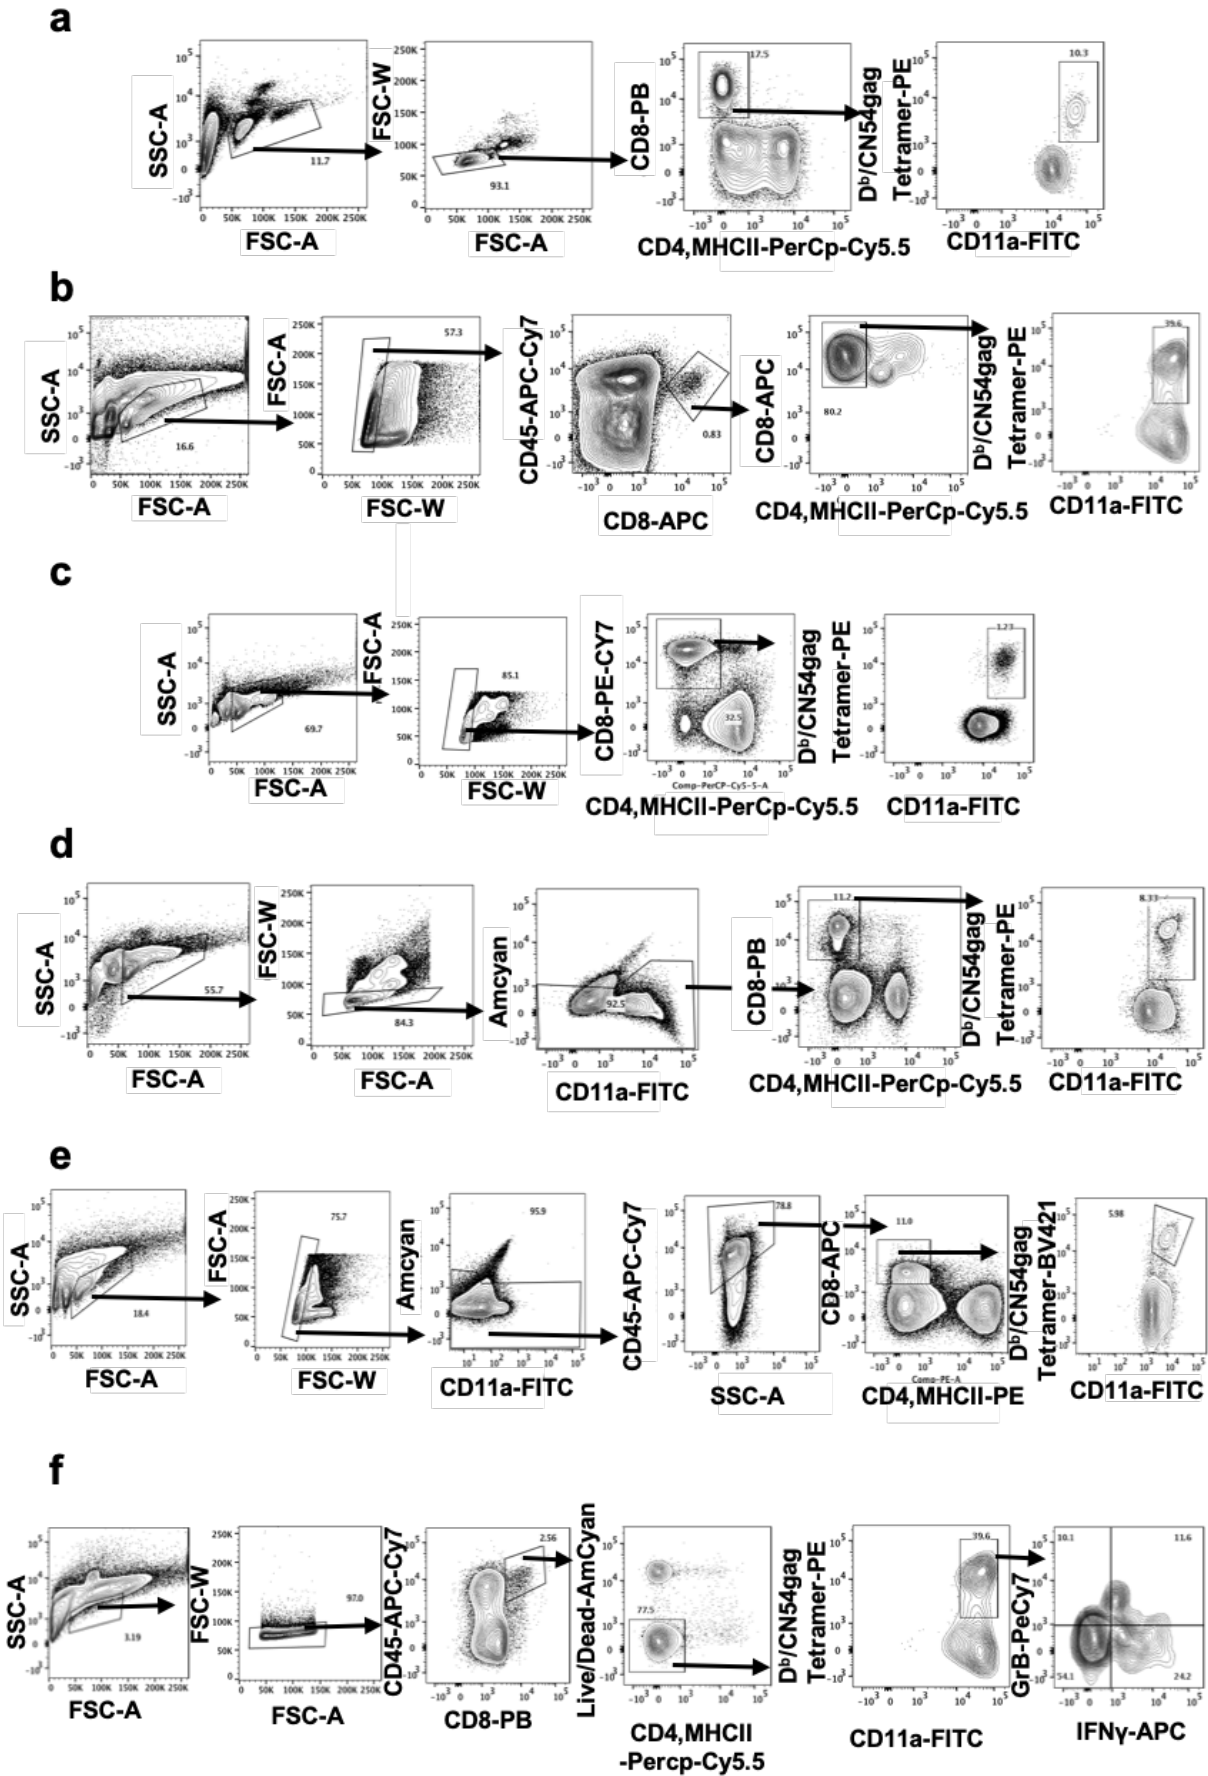

Supplementary Figure 15.

### Supplementary Figure 15

**Gating strategies used to identify Tet<sup>+</sup> cells.** (a,c) An example of a gating strategy applied to examine Tet<sup>+</sup> cells in blood of immunized mice in Figures 1b, 4a (upper panel), Supplementary Figure 2b and LNs in Supplementary Figure 3a. Lymphocytes were gated based on FSC-A and SSC-A and doublets were excluded based on the FSC-W and FSC-A gate. Tet<sup>+</sup> cells were identified within CD8<sup>+</sup>CD4<sup>-</sup>MHCII<sup>-</sup> gate as a D<sup>b</sup>/CN54gag Tet<sup>+</sup>CD11a<sup>high</sup> population. (b) Additional gating was applied to identify CD45<sup>+</sup> cells when Tet<sup>+</sup> cells were examined in peripheral tissues, such as FRT, in Figure 1f and 4a (lower panel) and Supplementary Figures 1a, 2a, 3b. (d,e) In spleen and lung cell suspensions, auto-fluorescent cells were gated out using an unstained channel (AmCyan). (e) Gating strategies used for detection of Tet<sup>+</sup> cells in spleens in Supplementary Figure 1b and in lungs in Supplementary figure 5a are shown. (f) Gating strategy used to identify poly-functional Tet<sup>+</sup> cells in the FRT in Figure 2d is shown. After gating on lymphocytes and single cells based on the SSC-A, FSC-A and FCS-W, CD45<sup>+</sup>CD8<sup>+</sup> cells were selected. Following exclusion of dead cells and cells expressing CD4 and MHCII, Tet<sup>+</sup> cells, identified as a D<sup>b</sup>/CN54gag Tet<sup>+</sup>CD11a<sup>high</sup> population, were further examined for the expression of IFN $\gamma$  and Granzyme B (GrB).

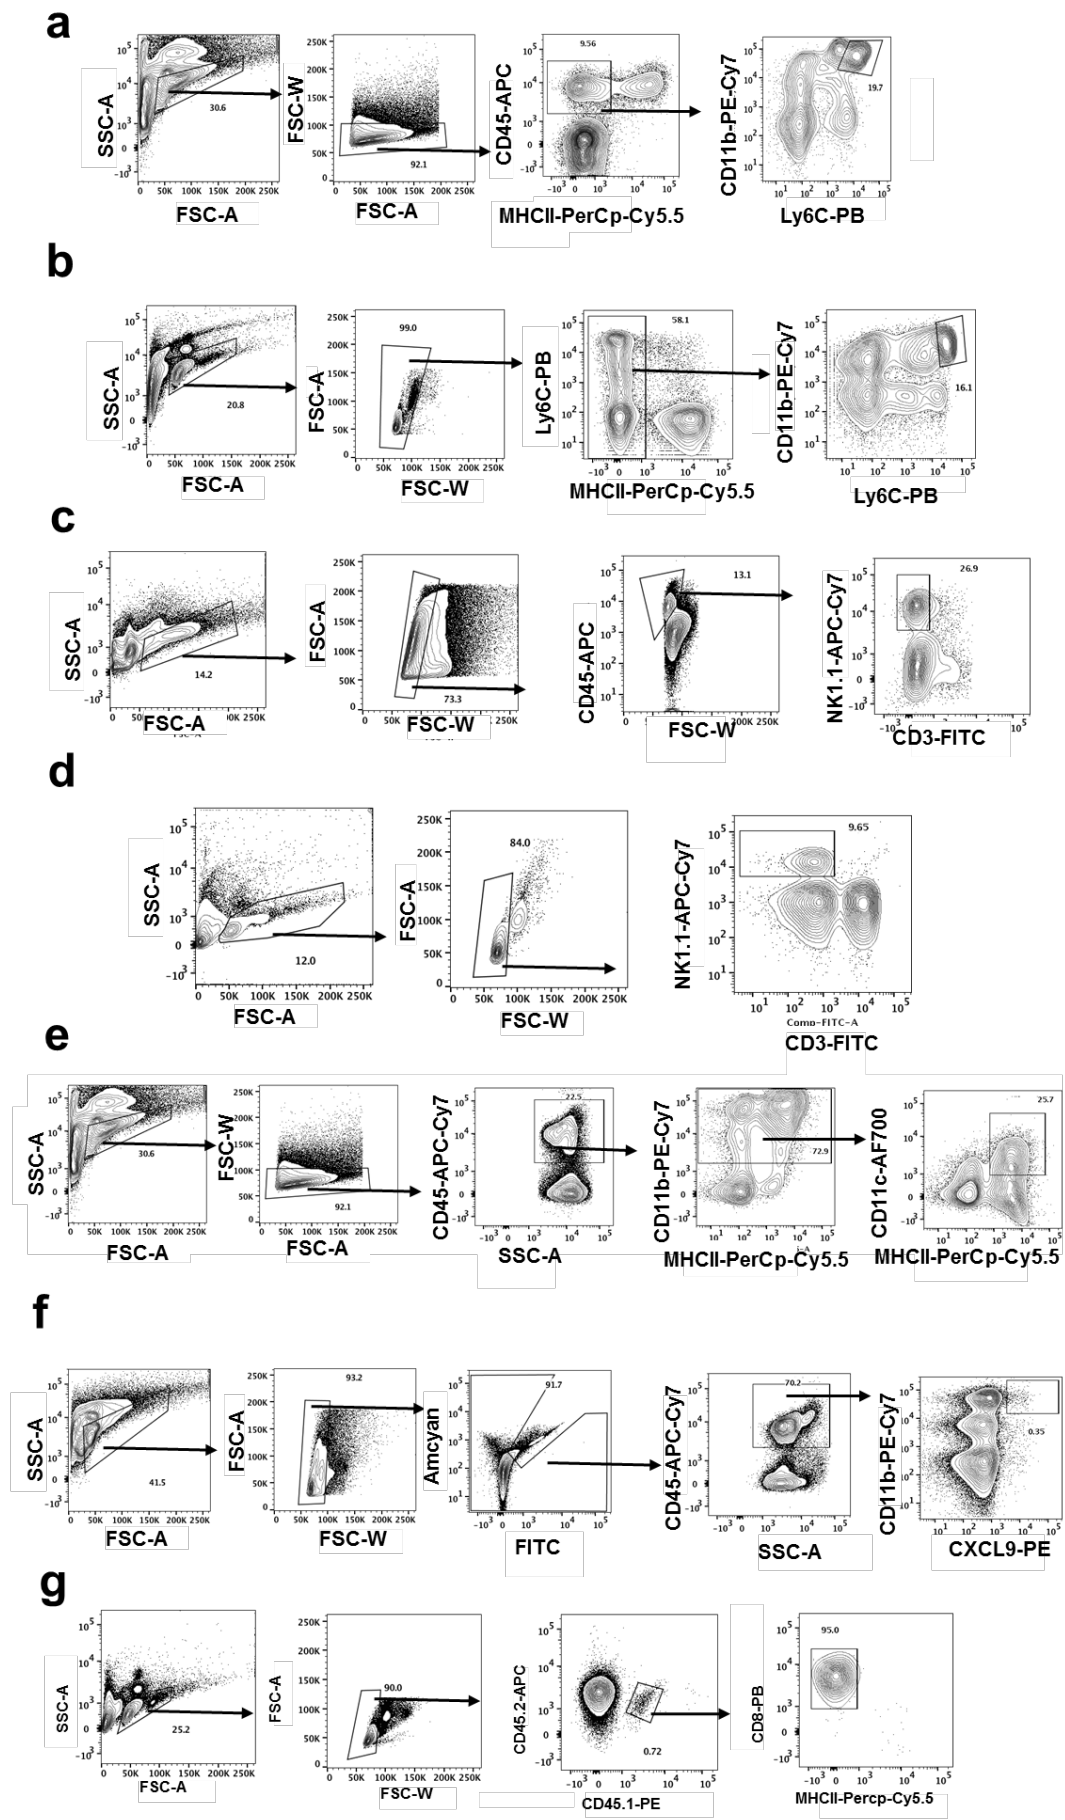

### **Supplementary Figure 16.**

**Other gating strategies.** (a) An example of a gating strategy used to define the monocyte population in the FRT in Figures 5b, 8f, 8i and Supplementary Figures 9a, 10c and 12d. After gating on the live and single cells based on SSC-A, FCS-A and FSC-W, the CD45<sup>+</sup> MHCII<sup>-</sup> population was further examined and monocytes were gated as CD11b<sup>+</sup>Ly6C<sup>hi</sup> cells. (b) Gating strategy used to define the monocyte population in blood in Supplementary Figures 10a and 12c. Within the live, single cell and MHCII<sup>-</sup> gates, monocytes were gated as CD11b<sup>+</sup>Ly6C<sup>+</sup> cells. (c) Gating strategy used to define NK cells in the FRT in Figure 6b and Supplementary Figures 10d and 12b. After gating on the live and single cells based on SSC-A, FCS-A and FSC-W, CD45<sup>+</sup> cells were further examined for the expression of CD3 and NK1.1. (d) Gating strategy used to define NK cell population in blood in Figure 6a and Supplementary figures 10b and 12a. Within live single cell gates, NK cells were gated as NK1.1<sup>+</sup>CD3<sup>-</sup> cells. (e) Gating strategy used to define DCs in the FRT in Figure 5c. After gating on the live and single cells based on SSC-A, FCS-A and FSC-W, CD45<sup>+</sup> cells were further divided into CD11b<sup>+</sup> and CD11b<sup>-</sup> populations. From the CD11b<sup>+</sup> gate, DCs were gated as CD11c<sup>+</sup>MHCII<sup>+</sup> cells. (f) Gating strategy used to define CXCL9-expressing cells in lungs in Supplementary Figure 8a. After gating on the live and single cells based on SSC-A, FCS-A and FSC-W, CD45<sup>+</sup> cells are further examined for the expression of CXCL9 and CD11b. (g) Gating strategy corresponding to data in Figure 4c-e. Adoptively transferred CD45.1<sup>+</sup> OT-I cells were identified based on CD45.1 and CD45.2 expression. They were further verified as CD8<sup>+</sup>MHCII<sup>-</sup>.

**Supplementary Table 1. Primers used for either cloning or real time PCR**

| <b>Gene</b>           | <b>Forward Primer</b>         | <b>Reverse Primer</b>     |
|-----------------------|-------------------------------|---------------------------|
| <i>HIV-1 CN54 gag</i> | aaagcggccgcgtagttctctctaaaagg | tttctcgagcttaagcttgatatcg |
| <i>Ad5</i>            | caacaagtcaacggatgtgg          | ccgggctgtagtcattgtt       |

**Supplementary Table 2. Antibodies used for Flow Cytometry.**

| <b>Mouse Antigen</b>             | <b>Clone</b>              | <b>Conjugates</b>                | <b>Source</b>                           | <b>Dilution</b> |
|----------------------------------|---------------------------|----------------------------------|-----------------------------------------|-----------------|
| CD16/32 (FcRII/III)              | 2.4G2                     | unconjugated                     | BD Biosciences                          | 1:50            |
| CD8                              | 53-6.7                    | PE-Cy7                           | BD Biosciences                          | 1:250           |
| CD4                              | RM4-5                     | PerCP                            | BD Biosciences                          | 1:250           |
| CD11b                            | M1/70                     | PE-Cy7                           | BD Biosciences                          | 1:250           |
| CD3                              | 145-2C11                  | FITC                             | BD Biosciences                          | 1:50            |
| MHC class II                     | 2G9                       | Biotin/Streptavidin              | BD Biosciences                          | 1:2000/1:1000   |
| Gr-1                             | RB6-8C5                   | PerCP-Cy5.5                      | BD Biosciences                          | 1:200           |
| CD45R/B220                       | RA3-6B2                   | Biotin/ Streptavidin             | BD Biosciences                          | 1:250           |
| CD4                              | GK1.5                     | Biotin/Streptavidin              | BD Biosciences                          | 1:250/1:1000    |
| NKp46                            | 29A1.4                    | APC                              | Biolegend                               | 1:200           |
| CD49b                            | DX5                       | Pacific Blue                     | Biolegend                               | 1:200           |
| CCR1                             | S15040E                   | APC                              | Biolegend                               | 1:100           |
| CCR5                             | HM-CCR5                   | PE-Cy7                           | Biolegend                               | 1:100           |
| CCR6                             | 29-2L17                   | PE                               | Biolegend                               | 1:100           |
| CCR7                             | 4B12                      | APC                              | eBioscience                             | 1:100           |
| CCR9                             | 242503                    | FITC                             | R&D                                     | 1:100           |
| CCR10                            | 248918                    | PE                               | R&D                                     | 1:100           |
| CXCR3                            | CXCR3-173                 | PE-Cy7                           | Biolegend                               | 1:200           |
| CXCR6                            | SA051D1                   | FITC                             | Biolegend                               | 1:100           |
| CXCL9                            | MIG-2F5.5                 | PE                               | Biolegend                               | 1:100           |
| $\alpha 4\beta 7$                | DATK32                    | PE                               | Biolegend                               | 1:100           |
| IFN $\gamma$                     | XMG1.2                    | APC                              | eBioscience                             | 1:200           |
| Granzyme B                       | NGZB                      | PE-Cy7                           | eBioscience                             | 1:100           |
| CD11a                            | M17/4                     | FITC                             | eBioscience                             | 1:200           |
| MHC II                           | M5/114.15.2               | PE                               | Biolegend                               | 1:2000          |
| MHC II                           | M5/114.15.2               | PerCP                            | Biolegend                               | 1:2000          |
| Ly6C                             | HK1.4                     | eFluor® 450                      | eBioscience                             | 1:200           |
| NK1.1                            | PK136                     | APC-Cy7                          | Biolegend                               | 1:200           |
| CD11c                            | HL3                       | APC                              | BD Biosciences                          | 1:250           |
| CD69                             | H1.2F3                    | PE                               | eBioscience                             | 1:200           |
| CD45.1                           | A20                       | PE                               | Biolegend                               | 1:200           |
| CD45.2                           | 104                       | APC                              | Biolegend                               | 1:200           |
| LIVE/DEAD Fixable Cell Stain Kit | Cat #: L34959             | Yellow                           | Invitrogen                              | 1:500           |
| LIVE/DEAD Fixable Cell Stain Kit | Cat #: L10119             | Near-IR                          | Invitrogen                              | 1:50            |
| Tetramer                         | Db/HIV-1-CN54 gag 308-318 | PE, APC and Brilliant Violet 421 | NIH tetramer facility, Emory University | 1:400           |
